# Supplementary material
Source: ML conference proceedings conference paper supplement (https://proceedings.neurips.cc/paper_files/paper/2019/hash/606555cf42a6719782a952aa33cfa2cb-Abstract.html)
Supplement: Supplementary file [file 606555cf42a6719782a952aa33cfa2cb-Supplemental.zip]

## A Proof of Theorem 1 and Corollary 1

To prove the theorem, we begin with two technical lemmas:

**Lemma 1** For every  $\epsilon > 0$ , there exists a neural-network of width  $3d$  with two hidden-layers ( $k = 3d, t = 3$ ) such that  $\mathcal{N}_{\mathbf{W}, \mathbf{B}}(\mathbf{x}) = \mathbf{x}$  for  $\mathbf{x} \in [0, 1]^d$ , and  $\mathcal{N}_{\mathbf{W}, \mathbf{B}}(\mathbf{x}) = 0$  for  $\mathbf{x} \in \mathbb{R}^d$  with  $d(\mathbf{x}, [0, 1]^d) = \min_{\mathbf{y} \in [0, 1]^d} \|\mathbf{x} - \mathbf{y}\| > \epsilon$ .

**Proof** Let  $N > 0$  be some constant, and observe the function:

$$f_i(\mathbf{x}) = \sigma(\sigma(x_i) - N \sum_{j=1}^d \sigma(-x_j) - N \sum_{j=1}^d \sigma(x_j - 1))$$

Notice that  $f_i(\mathbf{x}) = x_i$  for  $\mathbf{x} \in [0, 1]^d$ , and that  $f_i(\mathbf{x}) = 0$  if  $d(\mathbf{x}, [0, 1]^d) > \epsilon$ , when taking  $N$  to be large enough. Since  $f(\mathbf{x}) = (f_1(\mathbf{x}), \dots, f_d(\mathbf{x}))$  is a two hidden layer neural-network of width  $3d$ , the required follows. ■

**Lemma 2** For every  $\gamma > 0$ , there exists a neural-network of width  $2d$  with two hidden-layers ( $k = 2d, t = 3$ ) such that  $\mathcal{N}_{\mathbf{W}, \mathbf{B}}(\mathbf{x}) = 1$  for  $\mathbf{x} \notin [0, 1]^d$ , and  $\mathcal{N}_{\mathbf{W}, \mathbf{B}}(\mathbf{x}) = 0$  for  $\mathbf{x} \in [\gamma, 1 - \gamma]^d$ .

**Proof** Let  $N > 0$  be some constant, and observe the function:

$$\tilde{f}(\mathbf{x}) = 1 - \sigma(1 - N \sum_{j=1}^d \sigma(\gamma - x_j) - N \sum_{j=1}^d \sigma(x_j - 1 + \gamma))$$

Notice that  $\tilde{f}(\mathbf{x}) = 0$  for  $\mathbf{x} \in [\gamma, 1 - \gamma]^d$ , and that  $\tilde{f}(\mathbf{x}) = 1$  if  $\mathbf{x} \notin [0, 1]^d$ , when taking  $N$  to be large enough. Since  $\tilde{f}$  a two hidden layer neural-network of width  $2d$ , the required follows. ■

The next lemmas will show how a single block of the network operates on the set  $K_n$ :

**Lemma 3** There exists a neural-network of width  $\max\{dr, 3d\}$  with two hidden-layers ( $k = 3dr, t = 3$ ) such that for any  $n$  we have:

1.  $\mathcal{N}_{\mathbf{W}, \mathbf{B}}(K_n^\gamma) \subseteq K_{n-1}^\gamma$
2.  $\mathcal{N}_{\mathbf{W}, \mathbf{B}}(K_1 \setminus K_n) \subseteq \mathcal{X} \setminus K_{n-1}$

**Proof** As an immediate corollary from Lemma 1, there exists  $f : \mathbb{R}^d \rightarrow \mathbb{R}^d$ , that can be implemented by a neural network with two hidden-layers and width  $3d$ , such that  $f(\mathbf{x}) = \mathbf{x}$  for  $\mathbf{x} \in K_0$  and  $f(\mathbf{x}) = 0$  if  $d(\mathbf{x}, K_0) > \frac{\epsilon}{2}$ . Define the following function:

$$g(\mathbf{x}) = \sum_{i=1}^r f\left((\mathbf{M}^{(i)})^{-1}\mathbf{x} - (\mathbf{M}^{(i)})^{-1}\mathbf{v}^{(i)}\right) = \sum_{i=1}^r f\left(F_i^{-1}(\mathbf{x})\right)$$

Notice that for every  $\mathbf{x} \in \mathcal{X}$  there is at most one  $i \in [r]$  such that  $f(F_i^{-1}(\mathbf{x})) > 0$ . Indeed, assume there are  $i \neq j \in [r]$  such that  $f(F_i^{-1}(\mathbf{x})) > 0$  and  $f(F_j^{-1}(\mathbf{x})) > 0$ . Therefore,  $d(F_i^{-1}(\mathbf{x}), K_0) \leq \frac{\epsilon}{2}$  and  $d(F_j^{-1}(\mathbf{x}), K_0) \leq \frac{\epsilon}{2}$ . Therefore, there exist  $\mathbf{y}, \mathbf{z} \in K_0$  such that  $\|F_i^{-1}(\mathbf{x}) - \mathbf{y}\| \leq \frac{\epsilon}{2}$  and  $\|F_j^{-1}(\mathbf{x}) - \mathbf{z}\| \leq \frac{\epsilon}{2}$ . From this we get:

$$\|\mathbf{x} - F_i(\mathbf{y})\| \leq \|F_i^{-1}(\mathbf{x}) - \mathbf{y}\| \leq \frac{\epsilon}{2}$$

where we use the fact that  $F_i$  is a contraction. Similarly, we get that  $\|\mathbf{x} - F_j(\mathbf{z})\| \leq \frac{\epsilon}{2}$ , so this gives us  $\|F_i(\mathbf{y}) - F_j(\mathbf{z})\| \leq \epsilon$ . Since  $\mathbf{y}, \mathbf{z} \in K_0$ , this is contradiction to Assumption 1.

We now show the following:

- 431 1.  $g(K_n^\gamma) \subseteq K_{n-1}^\gamma$ :  
 432 Let  $\mathbf{x} \in K_n^\gamma$ , and denote  $i \in [r]$  the unique  $i$  for which  $\mathbf{x} \in F_i(K_{n-1}) \subseteq F_i(K_0)$ . From  
 433 the properties of  $f$ , we get that  $f(F_i^{-1}(\mathbf{x})) = F_i^{-1}(\mathbf{x})$  and  $f(F_j^{-1}(\mathbf{x})) = 0$  for  $j \neq i$ , so  
 434  $g(\mathbf{x}) = f(F_i^{-1}(\mathbf{x})) = F_i^{-1}(\mathbf{x}) \in K_{n-1}$ . Since  $\mathbf{x} \in K_n^\gamma$ , we have  $\mathbf{x} \in B_\gamma \subset K_n$  for some  
 435 ball of radius  $\gamma$  around  $\mathbf{x}$ . Note that since  $F_i$  is a contraction,  $F_i^{-1}$  is a linear expansive  
 436 mapping, so  $F_i^{-1}(B_\gamma)$  contains a ball of radius  $\gamma$  around  $F_i^{-1}(\mathbf{x})$ , so  $g(\mathbf{x}) \in K_{n-1}^\gamma$ .  
 437 2.  $g(K_1 \setminus K_n) \subseteq \mathcal{X} \setminus K_{n-1}$ :  
 438 Let  $\mathbf{x} \in K_1 \setminus K_n$  and assume by contradiction that  $g(\mathbf{x}) \in K_{n-1}$ . Let  $i \in [r]$  be the  
 439 unique  $i$  such that  $\mathbf{x} \in F_i(K_0)$  and we have seen that in this case  $g(\mathbf{x}) = F_i^{-1}(\mathbf{x})$ , so  
 440  $F_i^{-1}(\mathbf{x}) \in K_{n-1}$  and therefore  $\mathbf{x} \in F_i(K_{n-1}) \subseteq K_n$  in contradiction to the assumption.

441 Since  $g$  can be implemented with a neural network of width  $3dr$  and two hidden-layer, this completes  
 442 the proof of the lemma. ■  
 443

444 **Lemma 4** *There exists a neural-network of width  $2dr$  with two hidden-layers ( $k = 2dr, t = 3$ ) such*  
 445 *that for any  $n$  we have:*

- 446 1.  $\mathcal{N}_{\mathbf{W}, B}(\mathcal{X} \setminus K_1) = \{1\}$   
 447 2.  $\mathcal{N}_{\mathbf{W}, B}(K_1^\gamma) = \{0\}$

448 **Proof** As a corollary of Lemma 2, there exists  $\tilde{f} : \mathbb{R}^d \rightarrow \mathbb{R}$ , a two hidden-layer neural-network of  
 449 width  $2d$ , such that  $\tilde{f}(\mathbf{x}) = 1$  for  $\mathbf{x} \notin K_0$  and  $\tilde{f}(\mathbf{x}) = 0$  for  $\mathbf{x} \in K_0^\gamma$ . Now, define:

$$\tilde{g}(\mathbf{x}) = 1 - r + \sum_{i=1}^r \tilde{f}(F_i^{-1}(\mathbf{x}))$$

450 We show the following:

- 451 1.  $\tilde{g}(\mathcal{X} \setminus K_1) = \{1\}$ :  
 452 Let  $\mathbf{x} \notin K_1 = \cup_i F_i(K_0)$ , then for every  $i$  we have  $\mathbf{x} \notin F_i(K_0)$  and hence  $F_i^{-1}(\mathbf{x}) \notin K_0$   
 453 so  $\tilde{f}(F_i^{-1}(\mathbf{x})) = 1$  and so  $\tilde{g}(\mathbf{x}) = 1$ .  
 454 2.  $\tilde{g}(K_1^\gamma) = \{0\}$ :  
 455 Let  $\mathbf{x} \in K_1^\gamma$ , and let  $i$  be the unique index such that  $\mathbf{x} \in F_i(K_0)$ . So we have  $\tilde{f}(F_i^{-1}(\mathbf{x})) =$   
 456  $0$  and for all  $j \neq i$  we have  $\tilde{f}(F_j^{-1}(\mathbf{x})) = 1$ , and therefore  $\tilde{g}(\mathbf{x}) = 0$ .

457 And  $\tilde{g}$  can be implemented by a width  $2dr$  two hidden-layer network. ■  
 458

459 **Proof** of Theorem 1 Let  $g, \tilde{g}$  as defined in the previous lemmas. Denote  $h_0 : \mathbb{R}^d \rightarrow \mathbb{R}^{d+1}$  the  
 460 function:

$$h_0(\mathbf{x}) = [g(\mathbf{x}), \tilde{g}(\mathbf{x})]$$

461 and denote  $h : \mathbb{R}^{d+1} \rightarrow \mathbb{R}^{d+1}$  the function:

$$h(\mathbf{x}) = [g(\mathbf{x}_{1\dots d}), x_{d+1} + \tilde{g}(\mathbf{x}_{1\dots d})]$$

462 Denote  $h^n$  the composition of  $h$  on itself  $n$  times, and observe the network defined by  $H = h^{n-1} \circ h_0$ .  
 463 Note that  $H$  satisfies the following properties:

- 464 1. For  $\mathbf{x} \in K_n^\gamma$  we have  $H(\mathbf{x})_{d+1} = 0$ : indeed, by iteratively applying the previous lemmas,  
 465 we get that  $g^j(\mathbf{x}) \in K_1^\gamma$  for every  $j \leq n-1$ , and therefore  $\tilde{g}(g^j(\mathbf{x})) = 0$  for every  
 466  $j \leq n-1$ . Observe that:  $H(\mathbf{x})_{d+1} = \sum_{j=1}^{n-1} \tilde{g}(g^j(\mathbf{x})) = 0$ .  
 467 2. For  $\mathbf{x} \notin K_n$  we have  $H(\mathbf{x})_{d+1} \geq 1$ : there exists  $K_j$  such that  $\mathbf{x} \in K_j \setminus K_{j+1}$ , so by  
 468 applying 3 we get  $g^j(\mathbf{x}) \notin K_1$ , so  $\tilde{g}(g^j(\mathbf{x})) = 1$ , and therefore  $H(\mathbf{x})_{d+1} \geq 1$  (since the  
 469 summation is over positive values).

Therefore, composing  $H(x)$  with a linear threshold on  $H(x)_{d+1}$  gives a network as required. Since ever block of  $H$  has two hidden-layers of width  $5dr$ , we get that this network has depth  $2n + 1$  and width  $5dr$ .

This shows that there exists a neural-network of width  $5dr$  and depth  $2n + 1$ , s.t  $\text{sign}(\mathcal{N}_{\mathbf{W},B}(K_n^\gamma)) = 1$  and  $\text{sign}(\mathcal{N}_{\mathbf{W},B}(\mathcal{X} \setminus K_n)) = -1$ . Given the definition of the fractal distribution  $\mathcal{D}_n$ , this gives the required. ■

**Proof** of Corollary 1. Notice that for any  $s$  that divides  $n$ , any IFS of depth  $n$  with  $r$  transformations can be written as depth  $\frac{n}{s}$  IFS with  $r^s$  transformations. Indeed, for  $\mathbf{i} = (i_1, \dots, i_s) \in [r]^s$  denote  $F_{\mathbf{i}}(x) = F_{i_1} \circ \dots \circ F_{i_s}(x)$ , and we have:  $K_s = \cup_{\mathbf{i} \in [r]^s} F_{\mathbf{i}}(K_0)$ . So we can write a new IFS with transformations  $\{F_{\mathbf{i}}\}_{\mathbf{i} \in [r]^s}$ , and these will generate  $K_n$  in  $\frac{n}{s}$  iterations. So, we can rewrite the IFS with  $r^s$  transformations, generating  $K_{s \cdot \lfloor n/s \rfloor}$  in  $\lfloor n/s \rfloor$  iterations. Therefore, using the construction of Theorem 1, we have a network of depth  $2\lfloor \frac{n}{s} \rfloor$  and width  $5dr^s$  that maps  $K_{\lfloor n/s \rfloor}$  to  $K_0$ , and therefore maps  $K_n$  to  $K_{n - \lfloor n/s \rfloor}$ . Now, a two hidden-layer network of width at most  $dr^s$  can separate  $K_{n - \lfloor n/s \rfloor}^\gamma$  from  $\mathcal{X} \setminus K_{n - \lfloor n/s \rfloor}$ . This constructs a network of depth  $2\lfloor n/s \rfloor + 2$  and width  $5dr^s$  that achieves the required. ■

## B Proof of Theorem 2

**Lemma 5** Let  $\mathcal{N}_{\mathbf{W},B}$  be a network of depth  $t$  and of width  $k$ , such that  $\text{sign}(\mathcal{N}_{\mathbf{W},B}(K_n^\gamma)) = 1$  and  $\text{sign}(\mathcal{N}_{\mathbf{W},B}(\mathcal{X} \setminus K_n)) = -1$ . Denote  $s$  to be the ratio between the depth of the fractal and the depth of the network, so  $s := n/t$ . Then the width of the network grows exponentially with  $s$ , namely:  $k \geq \frac{d}{e} r^{s/d}$ .

**Proof** From Proposition 3 in [8] we get that there are  $\prod_{t'=1}^t \sum_{j=0}^d \binom{k}{j} \leq (ek/d)^{td}$  linear regions in  $\mathcal{N}_{\mathbf{W},B}$  (where we use Lemma A.5 from [16]). Furthermore, every such linear region is an intersection of affine half-spaces.

Note that any function such that  $\text{sign}(f(K_n^\gamma)) = 1$  and  $\text{sign}(f(\mathcal{X} \setminus K_n)) = -1$  has at least  $r^n$  such linear regions. Indeed, notice that  $K_n = \cup_{\mathbf{i} \in [r]^n} F_{\mathbf{i}}(K_0)$ . Assume by contradiction that there are  $< r^n$  linear regions, so there exists  $\mathbf{i} \neq \mathbf{j} \in [r]^n$  such that  $F_{\mathbf{i}}(K_0), F_{\mathbf{j}}(K_0)$  are in the same linear region. Fix  $x \in F_{\mathbf{i}}(K_0)^\gamma, y \in F_{\mathbf{j}}(K_0)^\gamma$  and observe the function  $f$  along the line from  $x$  to  $y$ . By our assumption  $f(x) \geq 0, f(y) \geq 0$ . This line must cross  $\mathcal{X} \setminus K_n$ , since from Assumption 1 we get that  $d(F_{\mathbf{i}}(K_0), F_{\mathbf{j}}(K_0)) > 0$  for every  $\mathbf{i} \neq \mathbf{j} \in [r]^n$ . Therefore  $f$  must get negative values along the line between  $x$  to  $y$ , so it must cross zero at least twice. Every linear region is an intersection of half-spaces, and hence convex, so  $f$  is linear on this path, and we reach a contradiction.

Therefore, we get that  $(ek/d)^{td} \geq r^n$ , and therefore:  $k \geq \frac{d}{e} r^{s/d}$ . ■

**Proof** of the Theorem 2. Let  $\mathcal{N}_{\mathbf{W},B} \in \mathcal{H}_{k,t}$ . From the above lemma, there exists  $x \in K_n^\gamma$  with  $\text{sign}(\mathcal{N}_{\mathbf{W},B}(x)) = -1$  or otherwise there exists  $x \in \mathcal{X} \setminus K_n$  with  $\text{sign}(\mathcal{N}_{\mathbf{W},B}(x)) = 1$ . Assume w.l.o.g that we have  $x \in K_n^\gamma$  with  $\text{sign}(\mathcal{N}_{\mathbf{W},B}(x)) = -1$ . Since  $\mathcal{N}_{\mathbf{W},B}$  is continuous, there exists a ball around  $x$ , with  $x \in B \subseteq K_n^\gamma$ , such that  $\text{sign}(\mathcal{N}_{\mathbf{W},B}(B)) = -1$ . From the properties of the distribution we get:

$$\begin{aligned} \mathbb{P}_{(x,y) \sim \mathcal{D}_n} [\text{sign}(\mathcal{N}_{\mathbf{W},B}(x)) \neq y] &\geq \mathbb{P}_{(x,y) \sim \mathcal{D}_n} [\text{sign}(\mathcal{N}_{\mathbf{W},B}(x)) \neq y \text{ and } x \in B] \\ &= \mathbb{P}_{(x,y) \sim \mathcal{D}_n} [x \in B] > 0 \end{aligned}$$

510

511

## C Proof of Theorem 3

**Proof** From Theorem 1 and Corollary 1, there exists a network of depth  $t = 2\lfloor j/s \rfloor + 2$  and width  $5dr^s$  such that  $\text{sign}(\mathcal{N}_{\mathbf{W},B}(K_j^\gamma)) = 1$  and  $\text{sign}(\mathcal{N}_{\mathbf{W},B}(\mathcal{X} \setminus K_j)) = -1$ . Notice that since

515  $K_n^\gamma \subseteq K_j^\gamma$ , we have:  $\mathbb{P}_{(x,y) \sim \mathcal{D}_n} [x \notin K_j^\gamma \text{ and } y = 1] = 0$ . Therefore for this network we get:  
 516  $\mathbb{P}_{(x,y) \sim \mathcal{D}_n} [\text{sign}(\mathcal{N}_{\mathbf{W},\mathbf{B}}(x)) \neq y] \leq \mathbb{P}_{(x,y) \sim \mathcal{D}_n} [x \in K_j \text{ and } y \neq 1] = 1 - P(j)$ . ■  
 517

## 518 D Proof of Theorem 4

519 **Proof** Using again [8], we get that the number of linear regions in  $\mathcal{N}_{\mathbf{W},\mathbf{B}}$  is  $r^{st}$ . This means  
 520 that  $\mathcal{N}_{\mathbf{W},\mathbf{B}}$  crosses zero at most  $r^{st}$  times. Now, fix  $n > j > st$ , and notice that  $K_j$  is a union  
 521 of  $r^j$  intervals, so  $K_j = \cup_{i=1}^{r^j} I_i$ , for intervals  $I_i$ . By our assumption, we get that for every  $i$ ,  
 522  $\mathbb{P}_{(x,y) \sim \mathcal{D}_n} [x \in I_i \text{ and } y = -1] = p$  for some  $p$ , and from this we get:

$$\mathbb{P}_{(x,y) \sim \mathcal{D}_n} [x \in I_i \text{ and } y = -1] = r^{-j} \mathbb{P}_{(x,y) \sim \mathcal{D}_n} [x \in K_j \text{ and } y = -1]$$

523 We get that there are at most  $r^{st}$  intervals of  $K_j$  in which  $\mathcal{N}_{\mathbf{W},\mathbf{B}}$  crosses zero. Denote  $J \subseteq [r^j]$  the  
 524 subset of intervals on which  $\text{sign}(\mathcal{N}_{\mathbf{W},\mathbf{B}})$  is constant, and for every  $i \in J$  we denote  $\hat{y}_i$  such that  
 525  $\text{sign}(\mathcal{N}_{\mathbf{W},\mathbf{B}}(I_i)) = \{\hat{y}_i\}$ . Notice that:

$$\begin{aligned} \mathbb{P}_{(x,y) \sim \mathcal{D}_n} [x \in K_j \text{ and } y = 1] &= \frac{1}{2} \\ \mathbb{P}_{(x,y) \sim \mathcal{D}_n} [x \in K_j \text{ and } y = -1] &= 1 - P(j) \end{aligned}$$

526 So the optimal choice for every  $\hat{y}_i$  is 1. Then we have:

$$\begin{aligned} \mathbb{P}_{(x,y) \sim \mathcal{D}_n} [\text{sign}(\mathcal{N}_{\mathbf{W},\mathbf{B}}(x)) \neq y] &= \mathbb{P}_{(x,y) \sim \mathcal{D}_n} [\text{sign}(\mathcal{N}_{\mathbf{W},\mathbf{B}}(x)) \neq -1 \text{ and } x \notin K_j] \\ &\quad + \mathbb{P}_{(x,y) \sim \mathcal{D}_n} [\text{sign}(\mathcal{N}_{\mathbf{W},\mathbf{B}}(x)) \neq y \text{ and } x \in K_j] \\ &\geq \sum_{i \in [r^j]} \mathbb{P}_{(x,y) \sim \mathcal{D}_n} [\text{sign}(\mathcal{N}_{\mathbf{W},\mathbf{B}}(x)) \neq y \text{ and } x \in I_i] \\ &\geq \sum_{i \in J} \mathbb{P}_{(x,y) \sim \mathcal{D}_n} [\hat{y}_i \neq y \text{ and } x \in I_i] \\ &\geq \sum_{i \in J} \mathbb{P}_{(x,y) \sim \mathcal{D}_n} [y = -1 \text{ and } x \in I_i] \\ &= |J| r^{-j} \mathbb{P}_{(x,y) \sim \mathcal{D}_n} [x \in K_j \text{ and } y = -1] \\ &\geq (1 - r^{st-j})(1 - P(j)) \end{aligned}$$

527  
 528

## 529 E Proof of Theorem 5

530 Observe that for every  $n'$ , we can write  $C_{n'}$  as union of  $2^{n'}$  intervals, so  $C_{n'} = \cup_j I_j$ . We can observe  
 531 the distribution limited to each of these intervals, and get the following:

532 **Lemma 6** Let  $\mathcal{D}_n$  be some cantor distribution (as defined in the paper). Then:

$$\begin{aligned} \left| \mathbb{E}_{(x,y) \sim \mathcal{D}_n} [y | x \in I_j] \right| &\leq 2 \left( P(n') - \frac{1}{2} \right) \\ \left| \mathbb{E}_{(x,y) \sim \mathcal{D}_n} [xy | x \in I_j] \right| &\leq 2 \left( P(n') - \frac{1}{2} \right) \end{aligned}$$

533 **Proof** Let  $I_j$  be some interval of  $C_{n'}$ , and let  $c_j$  be the central point of  $I_j$ . Notice that by definition  
 534 of the distribution we have:

$$\begin{aligned} \mathbb{P}_{(x,y) \sim \mathcal{D}_n} [y = 1 \text{ and } x \in I_j] &= 2^{-n'-1} \\ \mathbb{P}_{(x,y) \sim \mathcal{D}_n} [y = -1 \text{ and } x \in I_j] &= 2^{-n'-1} \left( 1 - \sum_{i=1}^{n'} p_i \right) = 2^{-n'} (1 - P(n')) \end{aligned}$$

535 So we get that  $\mathbb{P}_{(x,y) \sim \mathcal{D}_n} [x \in I_j] = 2^{-n'} (\frac{3}{2} - P(n'))$ , and therefore:

$$\begin{aligned} \left| \mathbb{E}_{(x,y) \sim \mathcal{D}_n} [y | x \in I_j] \right| &= \left| \mathbb{P}_{(x,y) \sim \mathcal{D}_n} [y = 1 | x \in I_j] - \mathbb{P}_{(x,y) \sim \mathcal{D}_n} [y = -1 | x \in I_j] \right| \\ &= \left| (P(n') - \frac{1}{2}) (\frac{3}{2} - P(n'))^{-1} \right| \\ &\leq 2 \left( P(n') - \frac{1}{2} \right) \end{aligned}$$

536 Notice that from the structure of the set  $C_n$ , the average of all the points in  $I_j \cap C_n$  is exactly the  
 537 central point  $c_j$  (this is due to the symmetry of the cantor set around its central point). Similarly, we  
 538 get that each level of the negative distribution,  $E_i := C_{i-1} \setminus C_i$ , its average is also  $c_j$ . So we get:

$$\mathbb{E}_{(x,y) \sim \mathcal{D}_n} [x | x \in I_j \text{ and } y = -1] = \mathbb{E}_{(x,y) \sim \mathcal{D}_n} [x | x \in I_j \text{ and } y = 1] = c_j$$

539 Therefore, we get that:

$$\begin{aligned} \mathbb{E}_{(x,y) \sim \mathcal{D}_n} [xy | x \in I_j] &= c_j \mathbb{P}_{(x,y) \sim \mathcal{D}_n} [y = 1 | x \in I_j] \\ &\quad - c_j \mathbb{P}_{(x,y) \sim \mathcal{D}_n} [y = -1 | x \in I_j] \\ &= c_j (P(n') - \frac{1}{2}) (\frac{3}{2} - P(n'))^{-1} \end{aligned}$$

540 So we have:

$$\left| \mathbb{E}_{(x,y) \sim \mathcal{D}_n} [xy | x \in I_j] \right| \leq 2 \left( P(n') - \frac{1}{2} \right)$$

541

542

543 Using this result, we get the following lemma:

544 **Lemma 7** Let  $g : \mathbb{R} \rightarrow \mathbb{R}^k, f : \mathbb{R}^k \rightarrow \mathbb{R}$  two functions, and let  $\mathbf{W} \in \mathbb{R}^{k \times k}, \mathbf{c} \in \mathbb{R}^k$ , such that for  
 545 every  $j$ ,  $g$  is affine on  $I_j$  and  $f$  is affine on  $\mathbf{W}g(I_j) + \mathbf{c} \subseteq \mathbb{R}^k$ . For every  $j$ , denote  $\mathbf{u}_j, \mathbf{v}_j, \mathbf{a}_j, \mathbf{b}_j \in \mathbb{R}^k$   
 546 such that for every  $\mathbf{x} \in I_j$ :

$$g(\mathbf{x}) = \mathbf{x} \mathbf{u}_j + \mathbf{a}_j, f(\mathbf{W}g(\mathbf{x}) + \mathbf{c}) = \mathbf{v}_j^\top (\mathbf{W}g(\mathbf{x}) + \mathbf{c}) + \mathbf{b}_j$$

547 Assume that  $\|\mathbf{u}_j\|_\infty, \|\mathbf{v}_j\|_\infty, \|\mathbf{a}_j\|_\infty, \|\mathbf{b}_j\|_\infty \leq 1$ . Denote  $h : \mathbb{R} \rightarrow \mathbb{R}$  s.t  $h(\mathbf{x}) = f(\mathbf{W}g(\mathbf{x}) + \mathbf{c})$ .  
 548 Then the following holds:

$$\begin{aligned} \left\| \mathbb{E}_{(x,y) \sim \mathcal{D}_F} \left[ -y \frac{\partial}{\partial \mathbf{W}} h(\mathbf{x}) \middle| \mathbf{x} \in C_{n'} \right] \right\|_{\max} &\leq 4 \left( P(n') - \frac{1}{2} \right) \\ \left\| \mathbb{E}_{(x,y) \sim \mathcal{D}_F} \left[ -y \frac{\partial}{\partial \mathbf{c}} h(\mathbf{x}) \middle| \mathbf{x} \in C_{n'} \right] \right\|_{\infty} &\leq 2 \left( P(n') - \frac{1}{2} \right) \end{aligned}$$

549 Where for matrix  $\mathbf{A}$  we denote  $\|\mathbf{A}\|_{\max} = \max_{i,j} |a_{i,j}|$ .

550 **Proof** For every  $\mathbf{x} \in I_j$  it holds that:

$$\begin{aligned} \frac{\partial}{\partial \mathbf{W}} h(\mathbf{x}) &= \frac{\partial}{\partial \mathbf{W}} [\mathbf{v}_j^\top (\mathbf{W}(\mathbf{u}_j \mathbf{x} + \mathbf{a}_j) + \mathbf{c}) + \mathbf{b}_j] = \mathbf{u}_j \mathbf{v}_j^\top \mathbf{x} + \mathbf{a}_j \mathbf{v}_j^\top \\ \frac{\partial}{\partial \mathbf{c}} h(\mathbf{x}) &= \frac{\partial}{\partial \mathbf{c}} [\mathbf{v}_j^\top (\mathbf{W}(\mathbf{u}_j \mathbf{x} + \mathbf{a}_j) + \mathbf{c}) + \mathbf{b}_j] = \mathbf{v}_j \end{aligned}$$

551 Using Lemma 6, we get:

$$\begin{aligned}
\left\| \mathbb{E}_{(x,y) \sim \mathcal{D}_F} \left[ -y \frac{\partial}{\partial \mathbf{W}} h(x) \middle| x \in I_j \right] \right\|_{\max} &= \left\| \mathbb{E}_{(x,y) \sim \mathcal{D}_F} \left[ -y(\mathbf{u}_j \mathbf{v}_j^\top x + \mathbf{a}_j \mathbf{v}_j^\top) \middle| x \in I_j \right] \right\|_{\max} \\
&\leq \left| \mathbb{E}_{(x,y) \sim \mathcal{D}_F} [-yx \middle| x \in I_j] \right| \cdot \|\mathbf{u}_j \mathbf{v}_j^\top\|_{\max} \\
&\quad + \left| \mathbb{E}_{(x,y) \sim \mathcal{D}_F} [-y \middle| x \in I_j] \right| \cdot \|\mathbf{a}_j \mathbf{v}_j^\top\|_{\max} \\
&\leq 4 \left( P(n') - \frac{1}{2} \right)
\end{aligned}$$

552

$$\begin{aligned}
\left\| \mathbb{E}_{(x,y) \sim \mathcal{D}_F} \left[ -y \frac{\partial}{\partial \mathbf{c}} h(x) \middle| x \in I_j \right] \right\|_{\infty} &= \left\| \mathbb{E}_{(x,y) \sim \mathcal{D}_F} [-y \mathbf{v}_j \middle| x \in I_j] \right\|_{\infty} \\
&= \left| \mathbb{E}_{(x,y) \sim \mathcal{D}_F} [-y \middle| x \in I_j] \right| \cdot \|\mathbf{v}_j\|_{\infty} \leq 2 \left( P(n') - \frac{1}{2} \right)
\end{aligned}$$

553 Finally, from this we get:

$$\begin{aligned}
\left\| \mathbb{E}_{(x,y) \sim \mathcal{D}_F} \left[ -y \frac{\partial}{\partial \mathbf{W}} h(x) \middle| x \in C_{n'} \right] \right\|_{\max} &\leq \sum_j \mathbb{P}[x \in I_j] \left\| \mathbb{E}_{(x,y) \sim \mathcal{D}_F} \left[ -y \frac{\partial}{\partial \mathbf{W}} h(x) \middle| x \in I_j \right] \right\|_{\max} \\
&\leq 4 \left( P(n') - \frac{1}{2} \right)
\end{aligned}$$

554

$$\begin{aligned}
\left\| \mathbb{E}_{(x,y) \sim \mathcal{D}_F} \left[ -y \frac{\partial}{\partial \mathbf{c}} h(x) \middle| x \in C_{n'} \right] \right\|_{\infty} &\leq \sum_j \mathbb{P}[x \in I_j] \left\| \mathbb{E}_{(x,y) \sim \mathcal{D}_F} \left[ -y \frac{\partial}{\partial \mathbf{c}} h(x) \middle| x \in I_j \right] \right\|_{\infty} \\
&\leq 2 \left( P(n') - \frac{1}{2} \right)
\end{aligned}$$

555

556

557 Now, we need to show that with high probability over the initialization of the network, every layer is  
558 affine on  $I_j$ -s.

559 **Lemma 8** Fix  $\delta \in (0, 1)$ , and let  $s \leq k$ . Let  $g : \mathbb{R} \rightarrow \mathbb{R}^s$  such that for every  $j$ ,  $g$  is affine and  
560 non-expansive on  $I_j$  (w.r.t to  $\|\cdot\|_{\infty}$ ). Let  $\mathbf{W} \in \mathbb{R}^{k \times s}$  a random matrix such that every entry is  
561 initialized uniformly from  $[-\frac{1}{2s}, \frac{1}{2s}]$ , and let  $b > 2k^2 \left(\frac{2}{3}\right)^{n'} \delta^{-1}$ , some fixed bias. Denote  $h(x) :=$   
562  $\psi(\mathbf{W}g(x) + b)$ , for some  $\psi$  that is affine on every interval that is bounded away from zero. Then  
563 with probability at least  $1 - \delta$ , for every  $j$ ,  $h(x)$  is affine and non-expansive on  $I_j$ .

564 **Proof** Denote  $\mathbf{w}_i \in \mathbb{R}^k$  the  $i$ -th row of  $\mathbf{W}$ . Fix some  $j$ , and denote  $c_j$  the central point of  $I_j$ . We  
565 show that:

$$\mathbb{P}_{\mathbf{w}_i \sim \mathcal{U}([- \frac{1}{2s}, \frac{1}{2s}]^s)} \left[ |\mathbf{w}_i^\top g(c_j) + b| \leq 3^{-n'} \right] \leq \frac{\delta}{k2^{n'}}$$

566 If  $\|g(c_j)\|_{\infty} \leq b$  then  $|\mathbf{w}_i^\top g(c_j)| \leq \|\mathbf{w}_i\|_1 \|g(c_j)\|_{\infty} \leq \frac{b}{2}$  and therefore  $|\mathbf{w}_i^\top g(c_j) + b| \geq \frac{b}{2} > 3^{-n'}$ .  
567 So we can assume  $\|g(c_j)\|_{\infty} > b$ , and let  $\ell \in [k]$  be some index such that  $g(c_j)_\ell > b$ . Now, fix  
568 some values for  $w_{i,1}, \dots, w_{i,\ell-1}, w_{i,\ell+1}, \dots, w_{i,k}$ , and observe the distribution of  $\mathbf{w}_i^\top g(c_j) + b$  (with  
569 respect to the randomness of  $w_{i,\ell}$ ). Since  $w_{i,\ell}$  is uniformly distributed in  $[-\frac{1}{2s}, \frac{1}{2s}]$ , we get that this

is a uniform distribution over some interval  $J$  with  $|J| \geq \frac{b}{s}$ . From this we get:

$$\begin{aligned} \mathbb{P}_{\mathbf{w}_i, \ell \sim \mathcal{U}([- \frac{1}{2s}, \frac{1}{2s}])} \left[ |\mathbf{w}_i^\top g(c_j) + b| \leq 3^{-n'} \right] &= \mathbb{P}_{x \sim \mathcal{U}(J)} \left[ x \in [-3^{-n'}, 3^{-n'}] \right] \\ &= |J \cap [-3^{-n'}, 3^{-n'}]| / |J| \\ &\leq |[-3^{-n'}, 3^{-n'}]| / |J| \\ &= \frac{2s3^{-n'}}{b} \leq \frac{\delta}{k2^{n'}} \end{aligned}$$

Since there are  $2^{n'}$  intervals  $I_j$  and  $k$  rows in  $\mathbf{W}$ , using the union bound we get that with probability at least  $1 - \delta$ , we have for all  $j \in [2^{n'}]$  that  $\|\mathbf{W}g(c_j) + b\|_\infty > 3^{-n'}$ . Since we have  $|I_j| = 3^{-n'}$ , and since  $g$  is non-expansive, this means that the set  $\mathbf{W}g(I_j) + b$  does not cross zero at any of its coordinates. Indeed, assume there exists  $i \in [k]$  such that  $\mathbf{w}_i^\top g(I_j) + b$  crosses zero, and assume w.l.o.g. that  $\mathbf{w}_i^\top g(I_j) + b > 0$ . Then there exists  $x \in I_j$  with  $\mathbf{w}_i^\top g(x) + b \leq 0$  and therefore:

$$3^{-n'} < |\mathbf{w}_i^\top g(x) - \mathbf{w}_i^\top g(c_j)| \leq \|\mathbf{w}_i\|_1 \|g(x) - g(c_j)\|_\infty \leq |x - c_j| \leq \frac{1}{2}3^{-n'}$$

and we reach contradiction.

Since  $\psi$  is affine on intervals that are bounded away from zero, we get that  $h(x) = \psi(\mathbf{W}g(x) + b)$  is affine on all  $I_j$ .

To show that  $h$  is non-expansive on  $I_j$ , let  $x, y \in I_j$ , and from the fact that  $g$  is non-expansive we have  $\|g(x) - g(y)\|_\infty \leq |x - y|$ . Since we showed that  $\psi$  is affine on  $\mathbf{W}g(I_j) + b$ , we get:

$$|h(x) - h(y)| = |\psi(\mathbf{W}g(x) + b) - \psi(\mathbf{W}g(y) + b)| = |\psi(\mathbf{W}(g(x) - g(y)))| \leq |\mathbf{W}(g(x) - g(y))|$$

Therefore, for every  $i$  we get:

$$|h(x)_i - h(y)_i| = |\mathbf{w}_i^\top (g(x) - g(y))| \leq \|\mathbf{w}_i\|_1 \|g(x) - g(y)\|_\infty \leq |x - y|$$

which completes the proof. ■

**Lemma 9** Let  $g : \mathbb{R} \rightarrow \mathbb{R}^s$  such that  $\|g(x)\|_\infty \leq 1$  for every  $x \in [0, 1]$ . Let  $\mathbf{W} \in \mathbb{R}^{k \times s}$  a random matrix such that every entry is initialized uniformly from  $[-\frac{1}{2s}, \frac{1}{2s}]$ , and let  $0 < b \leq \frac{1}{2}$  some bias. Denote  $h(x) := \sigma(\mathbf{W}g(x) + b)$ . Then  $\|h(x)\|_\infty \leq 1$  for every  $x \in [0, 1]$ .

**Proof** As before, we denote  $\mathbf{w}_i$  the  $i$ -th row of  $\mathbf{W}$ , then for every  $x \in [0, 1]$  we get:

$$\|h(x)\|_\infty \leq \max_i |\mathbf{w}_i^\top g(x) + b| \leq \max_i \|\mathbf{w}_i\|_1 \|g(x)\|_\infty + b \leq 1$$

588 ■

589

Iteratively applying this lemma gives a bound on the norm of any hidden representation in the network:

**Lemma 10** Assume we initialize a neural-network  $\mathcal{N}_{\mathbf{W}, \mathbf{B}}$  as described in Theorem 5, and denote  $\mathcal{N}_{\mathbf{W}, \mathbf{B}} = g^{(t)} \circ \dots \circ g^{(1)}$ . Denote  $G^{(t')} = g^{(t')} \circ \dots \circ g^{(1)}$ , the output of the layer  $t'$ . Then for every layer  $t'$  and for every  $x \in [0, 1]$  we get that:  $\|G^{(t')}(x)\|_\infty \leq 1$ .

**Proof** First,  $g^{(1)}(x) = \sigma(\mathbf{w}^{(1)}x + \mathbf{b}^{(1)})$ , where  $\mathbf{w}^{(1)} \sim \mathcal{U}([-\frac{1}{2}, \frac{1}{2}]^k)$  and  $\mathbf{b}^{(1)} = [\frac{1}{2}, \dots, \frac{1}{2}]$ , so for every  $x \in [0, 1]$  we have:

$$\|g^{(1)}(x)\|_\infty \leq \|\mathbf{w}^{(1)}\|_\infty |x| + \frac{1}{2} \leq 1$$

Now, from Lemma 9, if  $\|G^{(t')}(x)\|_\infty \leq 1$  for  $x \in [0, 1]$ , then  $\|G^{(t'+1)}(x)\|_\infty \leq 1$  for  $x \in [0, 1]$ .

By induction we get that  $\|G^{(t')}(x)\|_\infty \leq 1$  for  $x \in [0, 1]$  for every  $t' \leq t - 1$ . Finally, we have  $\mathbf{w}^{(t)} \sim \mathcal{U}([-\frac{1}{2k}, \frac{1}{2k}])$  and  $\mathbf{b}^{(t)} = \frac{1}{2}$ , and this gives us for every  $x \in [0, 1]$ :

$$|\mathcal{N}_{\mathbf{W}, \mathbf{B}}(x)| \leq |\mathbf{w}^{(t)} G^{(t-1)}(x) + \mathbf{b}^{(t)}| \leq \|\mathbf{w}^{(t)}\|_1 \|G^{(t-1)}(x)\|_\infty + \mathbf{b}^{(t)} \leq 1$$

600  
601

602 We also show that the gradients are bounded on all the examples in the distribution:

603 **Lemma 11** Assume we initialize a neural-network  $\mathcal{N}_{\mathbf{W}, \mathbf{B}}$  as described in Theorem 5. Then for every  
604 layer  $t'$ , and every example  $x \in [0, 1]$  we have:

$$\left\| \frac{\partial}{\partial \mathbf{W}^{(t')}} \mathcal{N}_{\mathbf{W}, \mathbf{B}}(x) \right\|_{\max} \leq 1$$

$$\left\| \frac{\partial}{\partial \mathbf{b}^{(t')}} \mathcal{N}_{\mathbf{W}, \mathbf{B}}(x) \right\|_{\infty} \leq 1$$

605 **Proof** Recall that we denote for every  $x \in [0, 1]$  the output of the layer  $t'$  to be  $x^{(t')} = G^{(t')}$ . Denote  
606  $\mathbf{D}^{(t')} = \text{diag}(\sigma'(\mathbf{W}^{(t')} x^{(t'-1)}))$ . We calculate the gradient of the weights at layer  $t'$ :

$$\begin{aligned} \frac{\partial}{\partial \mathbf{W}^{(t')}} \mathcal{N}_{\mathbf{W}, \mathbf{B}}(x) &= \frac{\partial}{\partial \mathbf{W}^{(t')}} g^{(t)} \circ \dots \circ g^{(t')} (\sigma(\mathbf{W}^{(t')} x^{(t'-1)} + \mathbf{b}^{(t')})) \\ &= (\mathbf{w}^{(t)})^\top \mathbf{D}^{(t-1)} \mathbf{W}^{(t-1)} \dots \mathbf{D}^{(t'+1)} \mathbf{W}^{(t'+1)} \mathbf{D}^{(t')} x^{(t'-1)} \end{aligned}$$

607 Denote  $\|\cdot\|_{\infty}^{OP}$  the operator norm induced by  $\ell_{\infty}$ , and we get (using the properties of the weights  
608 initialization):

$$\begin{aligned} \left\| \mathbf{D}^{(t-1)} \mathbf{W}^{(t-1)} \dots \mathbf{D}^{(t'+1)} \mathbf{W}^{(t'+1)} \mathbf{D}^{(t')} x^{(t'-1)} \right\|_{\infty} &\leq \left\| \mathbf{D}^{(t-1)} \right\|_{\infty}^{OP} \left\| \mathbf{W}^{(t-1)} \right\|_{\infty}^{OP} \dots \\ &\quad \cdot \left\| \mathbf{D}^{(t'+1)} \right\|_{\infty}^{OP} \left\| \mathbf{W}^{(t'+1)} \right\|_{\infty}^{OP} \left\| \mathbf{D}^{(t')} \right\|_{\infty}^{OP} \left\| x^{(t'-1)} \right\|_{\infty} \\ &\leq 1 \end{aligned}$$

609 And therefore:  $\left\| \frac{\partial}{\partial \mathbf{W}^{(t')}} \mathcal{N}_{\mathbf{W}, \mathbf{B}}(x) \right\|_{\max} \leq 1$  Finally, we calculate the gradient of the bias at layer  $t'$ :

$$\begin{aligned} \frac{\partial}{\partial \mathbf{b}^{(t')}} \mathcal{N}_{\mathbf{W}, \mathbf{B}}(x) &= \frac{\partial}{\partial \mathbf{b}^{(t')}} g^{(t)} \circ \dots \circ g^{(t')} (\sigma(\mathbf{W}^{(t')} x^{(t'-1)} + \mathbf{b}^{(t')})) \\ &= (\mathbf{w}^{(t)})^\top \mathbf{D}^{(t-1)} \mathbf{W}^{(t-1)} \dots \mathbf{D}^{(t'+1)} \mathbf{W}^{(t'+1)} \mathbf{D}^{(t')} \end{aligned}$$

610 And since  $\|\mathbf{w}^{(t)}\|_{\infty} \leq 1$  we get similarly to above that  $\left\| \frac{\partial}{\partial \mathbf{b}^{(t')}} \mathcal{N}_{\mathbf{W}, \mathbf{B}}(x) \right\|_{\infty} \leq 1$ . ■  
611

612 **Proof** of Theorem 5. Denote each layer of the network by  $g^{(i)}$ , so we have:  $\mathcal{N}_{\mathbf{W}, \mathbf{B}}(x) = g^{(t)} \circ \dots \circ$   
613  $g^{(1)}(x)$ . We show that two things hold on initialization:

614 1.  $|\mathcal{N}_{\mathbf{W}, \mathbf{B}}(x)| \leq 1$  for  $x \in [0, 1]$ : immediately from Lemma 10.

615 2. With probability at least  $1 - \delta$ , for every  $j$ ,  $\mathcal{N}_{\mathbf{W}, \mathbf{B}}$  is affine on  $I_j$ :

616 Denote  $\hat{\delta} = \frac{\delta}{t}$ , and notice that by the choice of  $n'$ , we get that  $2k^2 \left(\frac{2}{3}\right)^{n'} \hat{\delta}^{-1} < \frac{1}{2} = b$ .  
617 Therefore, since  $\sigma$  is affine on all intervals away from zero, we can apply Lemma 8 on  
618 all the hidden layers of the network (choosing  $s = 1, g = id$  for the first layer and  
619  $s = k, g = g^{(t')} \circ g^{(1)}$  for the rest), and use union bound to get the required.

620 Now, to prove the theorem, observe that since  $\mathcal{D}_n$  is supported on  $[0, 1] \times \{\pm 1\}$ , we get that upon  
621 initialization with probability 1 for  $(x, y) \sim \mathcal{D}_n$  we have:  $\max\{1 - y\mathcal{N}_{\mathbf{W}, \mathbf{B}}(x), 0\} = 1 - y\mathcal{N}_{\mathbf{W}, \mathbf{B}}(x)$ .



622 Since  $\mathcal{N}_{\mathbf{w},\mathbf{B}}(x)$  is affine on every  $I_j$  w.p  $1 - \delta$ , using Lemma 7 we get that in such case:

$$\begin{aligned}
\left\| \frac{\partial}{\partial \mathbf{W}} \mathcal{L}(\mathcal{N}_{\mathbf{w},\mathbf{B}}) \right\|_{\max} &= \left\| \frac{\partial}{\partial \mathbf{W}} \mathbb{E}_{(x,y) \sim \mathcal{D}_n} [\max\{1 - y\mathcal{N}_{\mathbf{w},\mathbf{B}}(x), 0\}] \right\|_{\max} \\
&= \left\| \mathbb{E}_{(x,y) \sim \mathcal{D}_n} \left[ -y \frac{\partial}{\partial \mathbf{W}} \mathcal{N}_{\mathbf{w},\mathbf{B}}(x) \right] \right\|_{\max} \\
&\leq \mathbb{P}_{(x,y) \sim \mathcal{D}_n} [x \in C_{n'}] \cdot \left\| \mathbb{E}_{(x,y) \sim \mathcal{D}_n} \left[ -y \frac{\partial}{\partial \mathbf{W}} \mathcal{N}_{\mathbf{w},\mathbf{B}}(x) \mid x \in C_{n'} \right] \right\|_{\max} \\
&\quad + \mathbb{P}_{(x,y) \sim \mathcal{D}_n} [x \notin C_{n'}] \cdot \left\| \mathbb{E}_{(x,y) \sim \mathcal{D}_n} \left[ -y \frac{\partial}{\partial \mathbf{W}} \mathcal{N}_{\mathbf{w},\mathbf{B}}(x) \mid x \notin C_{n'} \right] \right\|_{\max} \\
&\leq 4 \left( P(n') - \frac{1}{2} \right) + \left( P(n') - \frac{1}{2} \right) = 5 \left( P(n') - \frac{1}{2} \right)
\end{aligned}$$

623 and similarly we get  $\left\| \frac{\partial}{\partial \mathbf{B}} \mathcal{L}(\mathcal{N}_{\mathbf{w},\mathbf{B}}) \right\|_{\infty} \leq 3 \left( P(n') - \frac{1}{2} \right)$ .

624 To show that  $\mathbb{P}_{(x,y) \sim \mathcal{D}_n} [\text{sign}(\mathcal{N}_{\mathbf{w},\mathbf{B}}(x)) \neq y] \geq \left( \frac{3}{2} - P(n') \right) (1 - P(n'))$ , observe that the sign  
625 function is affine on intervals bounded away from zero. We can use Lemma 8 on the final layer, which  
626 shows that  $\text{sign}(\mathcal{N}_{\mathbf{w},\mathbf{B}})$  is affine on the intervals  $I_j$ , so for every  $I_j$  we get either  $\text{sign}(\mathcal{N}_{\mathbf{w},\mathbf{B}}(I_j)) =$   
627  $\{\hat{y}_j\}$  for some  $\hat{y}_j \in \{\pm 1\}$ . Now, using Lemma 7 we get that:

$$\begin{aligned}
\mathbb{P}_{(x,y) \sim \mathcal{D}_n} [\text{sign}(\mathcal{N}_{\mathbf{w},\mathbf{B}}(x)) \neq y \mid x \in I_j] &= \mathbb{E}_{(x,y) \sim \mathcal{D}_n} \left[ \frac{1}{2} - \frac{1}{2} y \hat{y}_j \mid x \in I_j \right] \\
&= \frac{1}{2} - \frac{1}{2} \hat{y}_j \mathbb{E}_{(x,y) \sim \mathcal{D}_n} [y \mid x \in I_j] \\
&\geq 1 - P(n')
\end{aligned}$$

628 And from this we get:

$$\begin{aligned}
\mathbb{P}_{(x,y) \sim \mathcal{D}_n} [\text{sign}(\mathcal{N}_{\mathbf{w},\mathbf{B}}(x)) \neq y] &= \mathbb{P}_{(x,y) \sim \mathcal{D}_n} [x \in C_{n'}] \mathbb{P}_{(x,y) \sim \mathcal{D}_n} [\text{sign}(\mathcal{N}_{\mathbf{w},\mathbf{B}}(x)) \neq y \mid x \in C_{n'}] \\
&\quad + \mathbb{P}_{(x,y) \sim \mathcal{D}_n} [x \notin C_{n'}] \mathbb{P}_{(x,y) \sim \mathcal{D}_n} [\text{sign}(\mathcal{N}_{\mathbf{w},\mathbf{B}}(x)) \neq y \mid x \notin C_{n'}] \\
&\geq \left( \frac{3}{2} - P(n') \right) (1 - P(n'))
\end{aligned}$$

629

630

## 631 F Proof of Corollary 2 and Corollary 3

632 **Proof** of Corollary 2. Denote  $a = 2 \log^{-1}(\frac{3}{2})$ ,  $b = 2 \log^{-1}(\frac{3}{2}) \log(\frac{4k^2}{\delta}) + 1$ , and from Lemma  
633 A.2 in [16], we get that if  $t > 4a \log(2a) + 2b$  then  $t > a \log(t) + b$ . Choosing  $n = \frac{t}{2}$  gives  
634  $n > \log^{-1}(\frac{3}{2}) \log(\frac{4tk^2}{\delta}) + 1$ , so applying Theorem 5 shows that  $\mathcal{D}_F^n$  satisfies 3. Theorem 1  
635 immediately gives 1. Note that  $\mathcal{D}_F^n$  can be realized only by functions with at least  $2^{n-1} + 1$  linear  
636 regions. Shallow networks on  $\mathbb{R}$  of width  $k$  have at most  $k + 1$  linear regions, so this gives 2. ■  
637

638 **Proof** of Corollary 3. Using Theorem 3 and the strong depth separation property we get that  
639 for every  $t'$  we have:  $1 - P\left(\frac{t'-1}{2}\right) \geq L_{\mathcal{D}}(\mathcal{H}_{10,t'}) \geq \frac{1}{2} - \epsilon^{n-t'}$ . Choosing  $t' = \frac{n}{2}$  and taking  
640  $n' = \frac{n}{4} - \frac{1}{2}$  we get  $P(n') \leq \frac{1}{2} + \epsilon^{n/2}$ . By the choice of  $n$  we can apply Theorem 5 and get the  
641 required. ■  
642

643 **G Experimental Results**

The following tables summarize the results of all the experiments that are detailed in Section 5.  
Table 1: Performance of different network architectures on various fractal distributions of depth 5,  
with different fractal structures.

| DEPTH / WIDTH       | 10   | 20   | 50   | 100  | 200  | 400  |
|---------------------|------|------|------|------|------|------|
| SIERPINSKY TRIANGLE |      |      |      |      |      |      |
| 1                   | 0.78 | 0.82 | 0.88 | 0.87 | 0.89 | 0.90 |
| 2                   | 0.86 | 0.91 | 0.93 | 0.94 | 0.95 | 0.95 |
| 3                   | 0.89 | 0.92 | 0.96 | 0.96 | 0.97 | 0.97 |
| 4                   | 0.87 | 0.94 | 0.97 | 0.97 | 0.97 | 0.98 |
| 5                   | 0.89 | 0.94 | 0.96 | 0.97 | 0.97 | 0.98 |
| 2D CANTOR SET       |      |      |      |      |      |      |
| 1                   | 0.61 | 0.69 | 0.72 | 0.73 | 0.72 | 0.74 |
| 2                   | 0.72 | 0.81 | 0.82 | 0.86 | 0.86 | 0.87 |
| 3                   | 0.78 | 0.84 | 0.88 | 0.92 | 0.93 | 0.93 |
| 4                   | 0.82 | 0.86 | 0.91 | 0.95 | 0.97 | 0.97 |
| 5                   | 0.81 | 0.87 | 0.95 | 0.97 | 0.99 | 0.98 |
| PENTAFLAKE          |      |      |      |      |      |      |
| 1                   | 0.66 | 0.65 | 0.67 | 0.70 | 0.76 | 0.76 |
| 2                   | 0.71 | 0.73 | 0.79 | 0.81 | 0.82 | 0.83 |
| 3                   | 0.73 | 0.78 | 0.83 | 0.84 | 0.85 | 0.86 |
| 4                   | 0.76 | 0.79 | 0.85 | 0.87 | 0.88 | 0.88 |
| 5                   | 0.76 | 0.81 | 0.86 | 0.88 | 0.87 | 0.90 |
| VICSEK              |      |      |      |      |      |      |
| 1                   | 0.59 | 0.60 | 0.63 | 0.66 | 0.67 | 0.68 |
| 2                   | 0.64 | 0.70 | 0.72 | 0.75 | 0.76 | 0.75 |
| 3                   | 0.69 | 0.72 | 0.77 | 0.79 | 0.81 | 0.82 |
| 4                   | 0.71 | 0.74 | 0.79 | 0.82 | 0.83 | 0.84 |
| 5                   | 0.70 | 0.77 | 0.82 | 0.84 | 0.86 | 0.86 |

644

Table 2: Performance of depth 5 network on the different fractal structure (of depth 5), with varying approximation curves.

| CURVE # / WIDTH     | 10   | 20   | 50   | 100  | 200  | 400  |
|---------------------|------|------|------|------|------|------|
| SIERPINSKY TRIANGLE |      |      |      |      |      |      |
| 1                   | 0.89 | 0.94 | 0.96 | 0.97 | 0.97 | 0.98 |
| 2                   | 0.89 | 0.94 | 0.96 | 0.97 | 0.97 | 0.97 |
| 3                   | 0.78 | 0.94 | 0.96 | 0.97 | 0.97 | 0.97 |
| 4                   | 0.79 | 0.92 | 0.96 | 0.96 | 0.97 | 0.97 |
| 5                   | 0.76 | 0.89 | 0.96 | 0.97 | 0.97 | 0.97 |
| 6                   | 0.76 | 0.90 | 0.97 | 0.97 | 0.98 | 0.98 |
| 2D CANTOR SET       |      |      |      |      |      |      |
| 1                   | 0.81 | 0.87 | 0.95 | 0.97 | 0.99 | 0.98 |
| 2                   | 0.70 | 0.85 | 0.92 | 0.94 | 0.94 | 0.97 |
| 3                   | 0.62 | 0.73 | 0.75 | 0.80 | 0.91 | 0.89 |
| 4                   | 0.53 | 0.65 | 0.77 | 0.77 | 0.84 | 0.93 |
| 5                   | 0.57 | 0.61 | 0.65 | 0.69 | 0.76 | 0.73 |
| 6                   | 0.53 | 0.64 | 0.66 | 0.78 | 0.71 | 0.61 |
| PENTAFLAKE          |      |      |      |      |      |      |
| 1                   | 0.76 | 0.81 | 0.86 | 0.88 | 0.87 | 0.90 |
| 2                   | 0.59 | 0.68 | 0.77 | 0.78 | 0.80 | 0.84 |
| 3                   | 0.54 | 0.57 | 0.64 | 0.63 | 0.72 | 0.64 |
| 4                   | 0.53 | 0.55 | 0.58 | 0.61 | 0.65 | 0.68 |
| 5                   | 0.52 | 0.52 | 0.52 | 0.55 | 0.60 | 0.57 |
| 6                   | 0.52 | 0.52 | 0.52 | 0.53 | 0.56 | 0.54 |
| VICSEK              |      |      |      |      |      |      |
| 1                   | 0.70 | 0.77 | 0.82 | 0.84 | 0.86 | 0.86 |
| 2                   | 0.59 | 0.61 | 0.67 | 0.69 | 0.71 | 0.71 |
| 3                   | 0.56 | 0.55 | 0.58 | 0.64 | 0.64 | 0.65 |
| 4                   | 0.51 | 0.52 | 0.54 | 0.56 | 0.58 | 0.59 |
| 5                   | 0.52 | 0.52 | 0.52 | 0.55 | 0.53 | 0.57 |
| 6                   | 0.53 | 0.51 | 0.51 | 0.55 | 0.58 | 0.59 |
